# Supplementary material for: Surface-modified ZnSe waveguides for label-free infrared attenuated total reflection detection of DNA hybridization
Source: Royal Society of Chemistry journal article supplement (doi:10.1039/c0an00504e), 2011-01-01
Supplement: c0an00504e.pdf [file c0an00504e.pdf]

# SUPPORTING INFORMATION

## Surface-modified ZnSe Waveguides for Label-free Infrared Attenuated Total Reflection Detection of DNA Hybridization

Carla S. Riccardi,<sup>1#</sup> Dennis W. Hess,<sup>2</sup> and Boris Mizaikoff<sup>3\*</sup>

<sup>1</sup>*School of Chemistry and Biochemistry, Georgia Institute of Technology, Atlanta, GA 30332, U.S.A.*

<sup>2</sup>*School of Chemical and Biomolecular Engineering, Georgia Institute of Technology, Atlanta, GA 30332, U.S.A.*

<sup>3</sup>*Institute of Analytical and Bioanalytical Chemistry, University of Ulm, 89081 Ulm, Germany*

<sup>#</sup>*Now with: Institute of Chemistry, Department of Physical Chemistry, Universidade Estadual Paulista, 14800-900 Araraquara, São Paulo, Brazil*

\*Corresponding author: boris.mizaikoff@uni-ulm.de

Figure S1 displays the chemical modification of the ZnSe surface for determining the DNA hybridization event via IR-ATR spectroscopy. An acid-terminated surface (Fig. S1a) was chemically activated with NHS/EDC (Fig. S1b) for 1h at room temperature. This resulted in an appearance of new peaks in the IR-ATR spectrum (1815, 1787, and 1739  $\text{cm}^{-1}$ ), which are assigned to the succinimidyl ester (i.e., the stretching modes of the carbonyl functionality at 1815 and 1787  $\text{cm}^{-1}$  are characteristic of the succinimidyl moiety).

After exposition of the substrate to the probe DNA and blocking using ethanolamine, the IR-ATR spectrum of the DNA-modified surface (Fig. S1c) reveals the disappearance of all three modes resulting from the NHS ester groups, and the appearance of peaks at 1650 and 1550  $\text{cm}^{-1}$ , which are assigned to the carbonyl function and the CNH vibration of the amide. The phosphate and glycoside groups of the DNA backbone are evident at 1550, 1292, and 1100  $\text{cm}^{-1}$ . After DNA hybridization (Fig. S1d), an increase of the bands assigned to DNA is evident.

Furthermore, a shift from 1100  $\text{cm}^{-1}$  to 1064  $\text{cm}^{-1}$  was observed suggesting that these bands permit the distinction between ssDNA and dsDNA, thereby enabling the direct and label-free detection of DNA hybridization at ZnSe surfaces via IR-ATR spectroscopy.

In addition, control experiments (Figure S2) were performed with a 5bp-mismatched DNA sequence (5'-ATT TCT GGG TAT TGA GCG-3', 20  $\mu\text{M}$  mol), and did not reveal signatures indicating unspecific binding. As no shift from 1100  $\text{cm}^{-1}$  to 1064  $\text{cm}^{-1}$  was observed during this control experiment, further evidence for the utility of this shift in identifying hybridization events with the target DNA is provided (Fig. S1d).

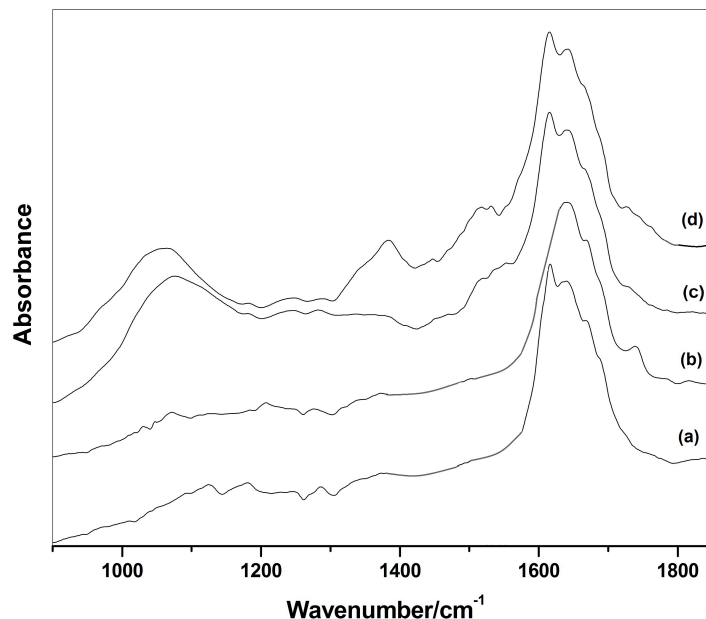

**Figure S1.** IR-ATR spectra of the ZnSe surface modified with undecylenic acid (a), after the surface was reacted with NHS/EDC for 1 h at room temperature (b), after exposure to probe DNA and blocking using ethanolamine (c), and after DNA hybridization (d). The IR spectra shown here are not baseline corrected.

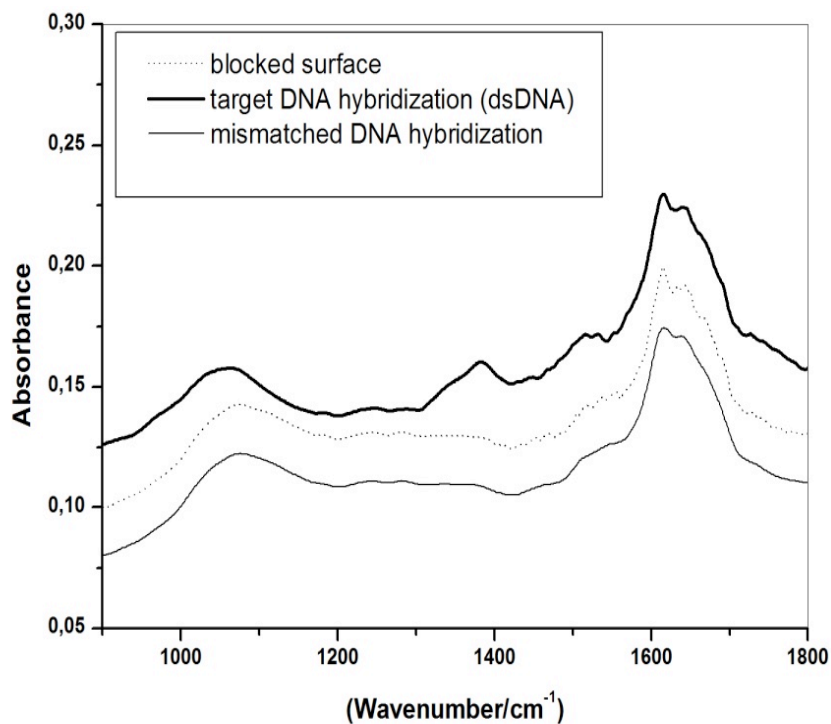

**Figure S2.** IR-ATR spectra of the DNA-modified waveguide surface after the blocking step, after exposure to 5bp-mismatched DNA, and after hybridization with the target DNA sequence. The IR spectra shown here are not baseline corrected.
